# Supplementary material for: Temporally resolved thermal desorption of volatile organics from nanoporous silica preconcentrator
Source: Royal Society of Chemistry journal article supplement (doi:10.1039/d0an01822h), 2020-11-04
Supplement: d0an01822h1.pdf [file d0an01822h1.pdf]

## SUPPLEMENTARY INFORMATION

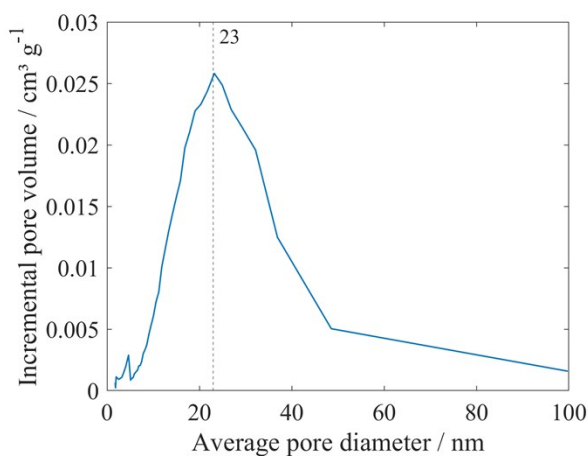

Figure S1: BJH adsorption pore size distribution

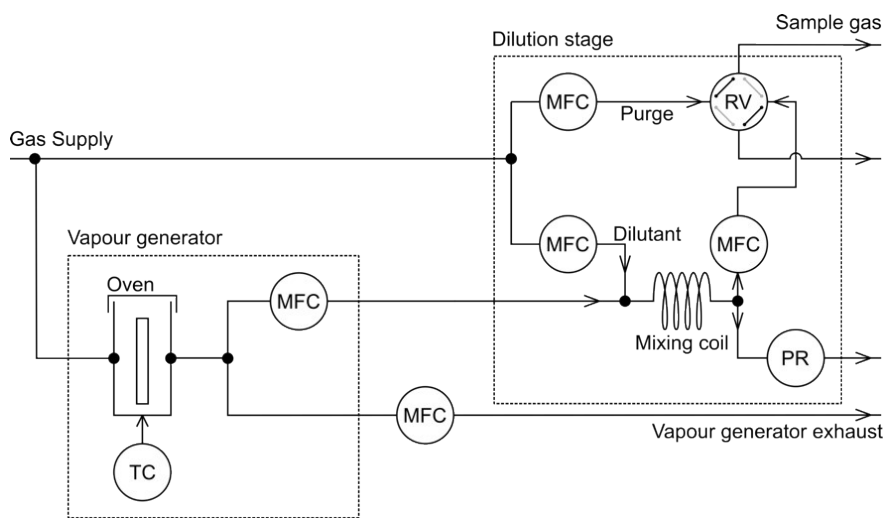

Figure S2: Schematic diagram of the gas system (TC = temperature controller; MFC = mass-flow controller; RV = rotary valve; PR = pressure regulator)
